# Supplementary material
Source: ML conference proceedings conference paper supplement (https://openreview.net/forum?id=TrecISByKi)

## Problem Statement

We consider the problem of selecting best prompts and LLMs during deployment when a robot is deployed for LLM-informed object search tasks in partially-known environments.

Different prompts lead to different behavior during deployment for object search tasks.

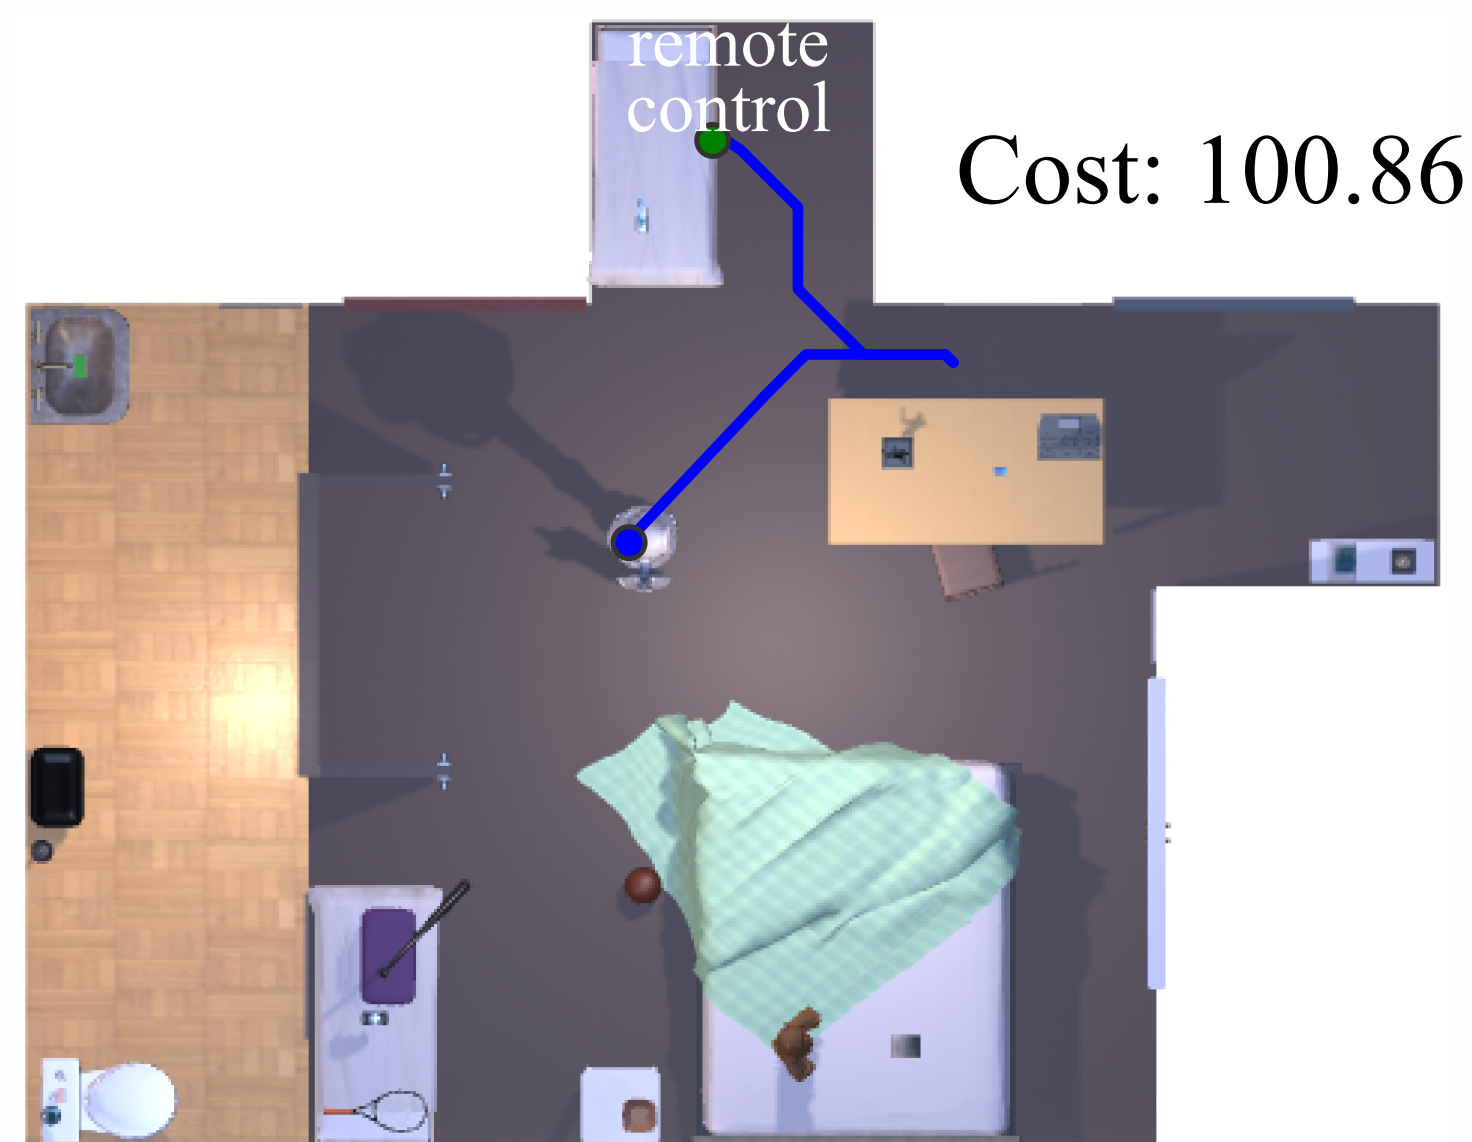

Prompt 1: P-CONTEXT-A

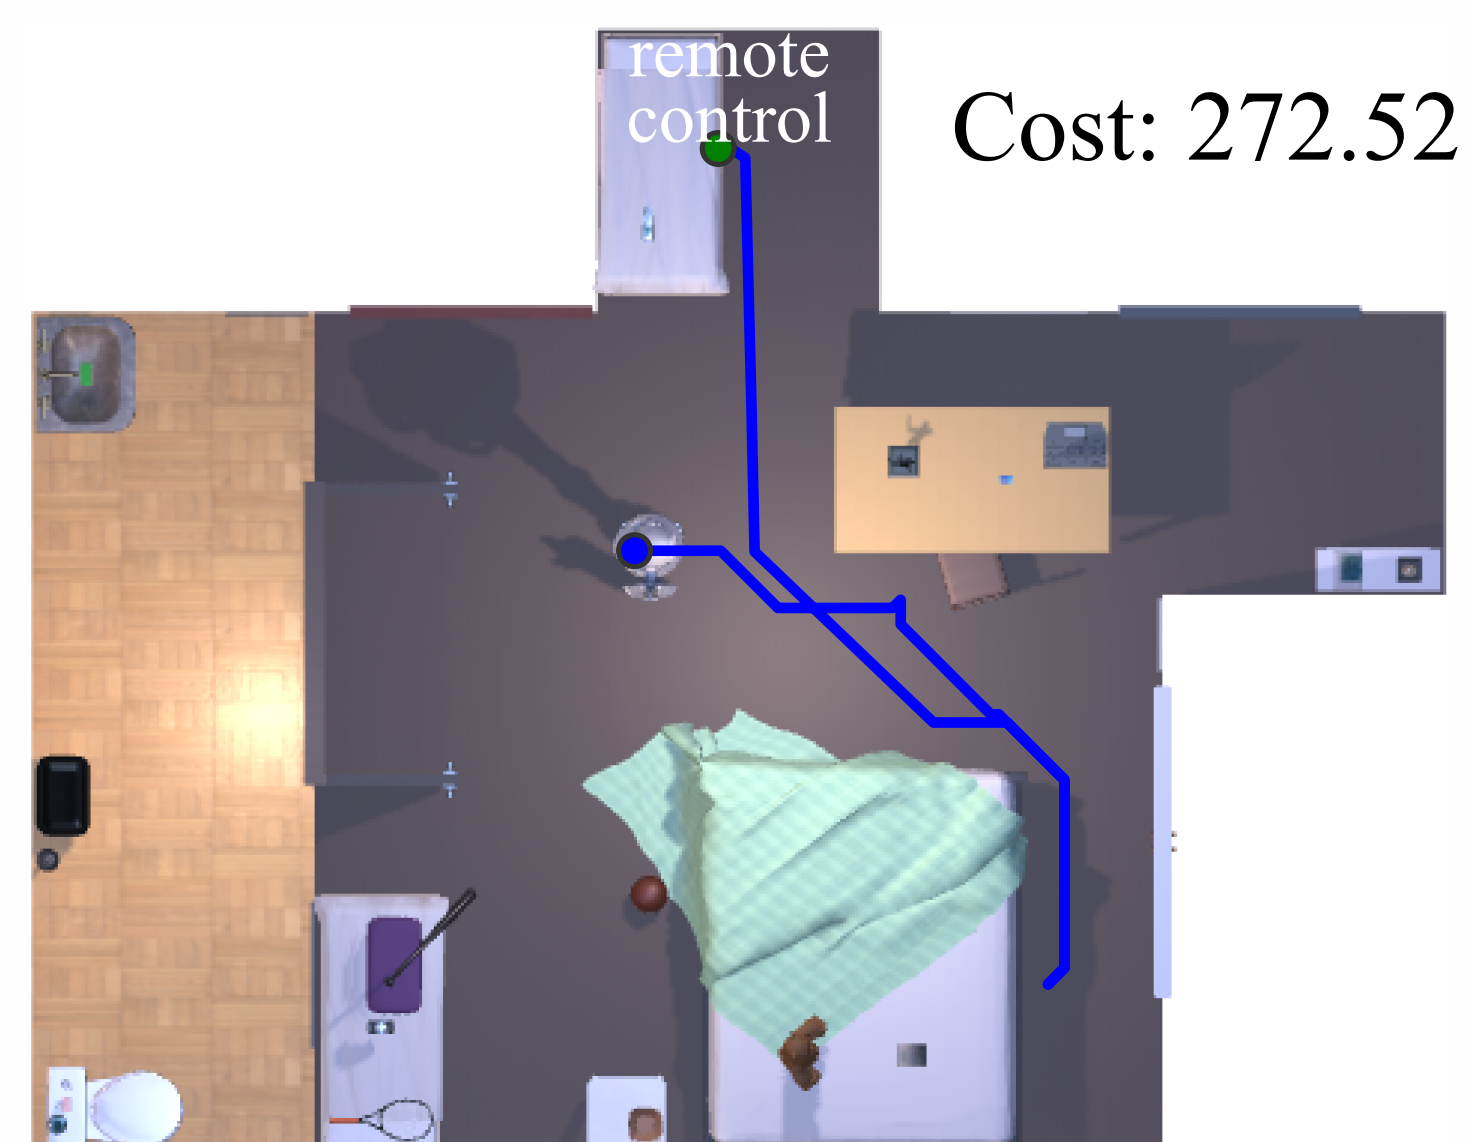

Prompt 2: P-CONTEXT-B

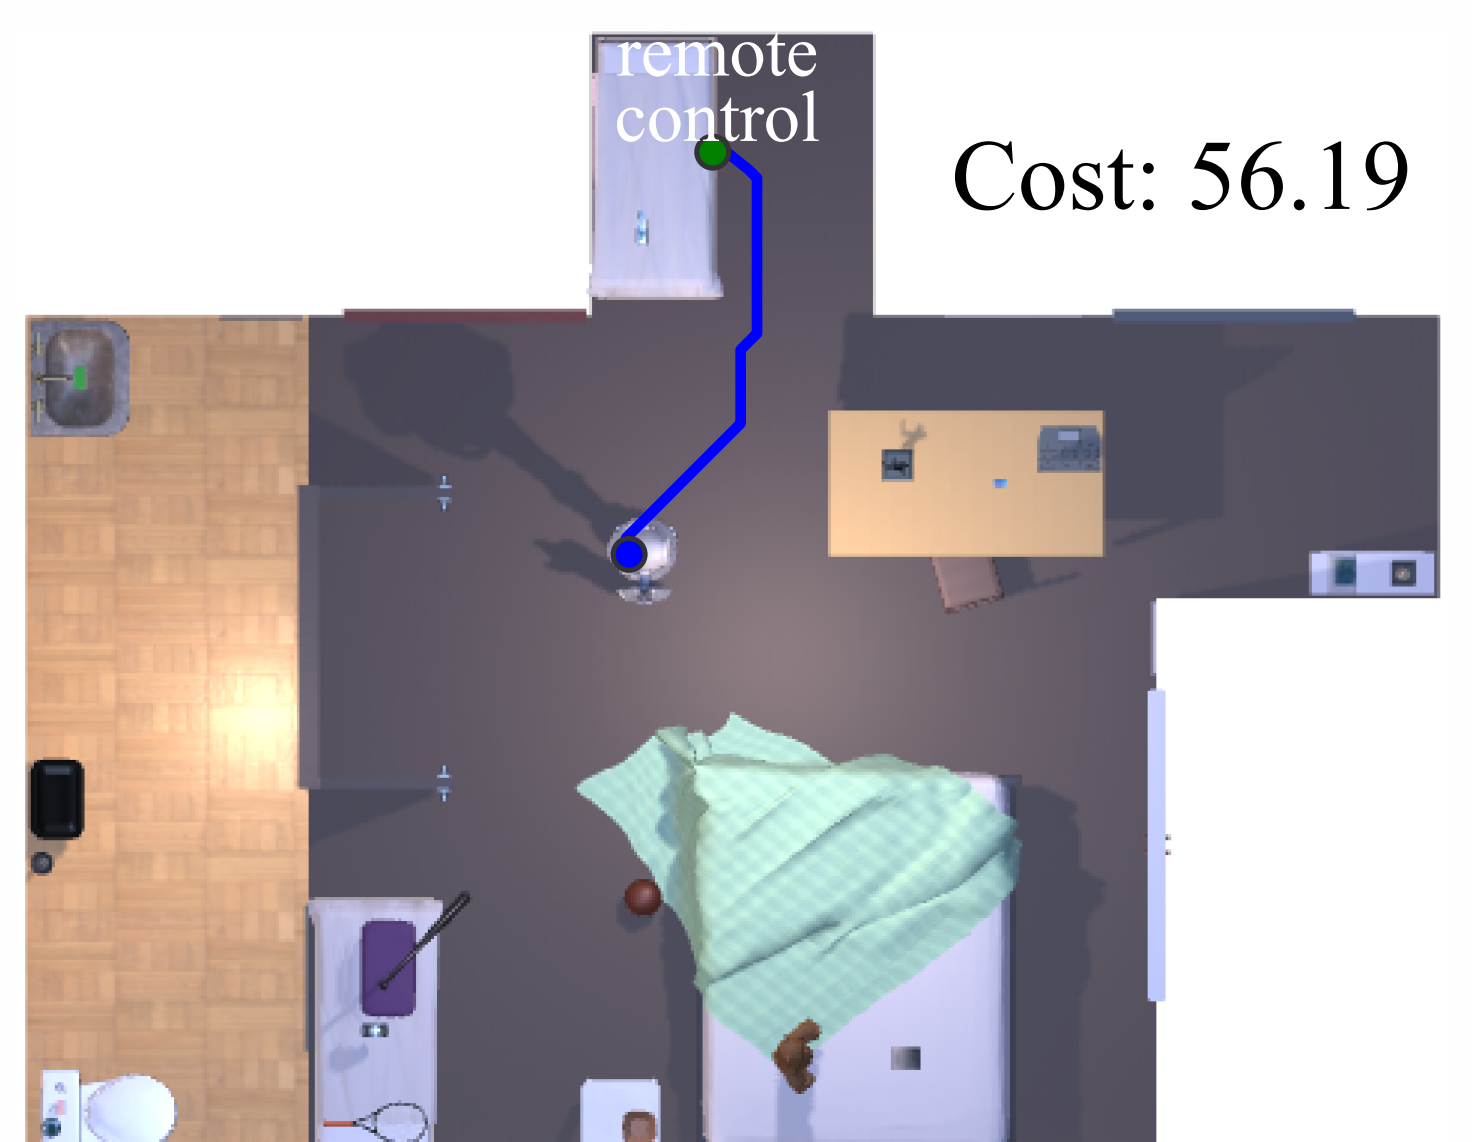

Prompt 3: P-MINIMAL

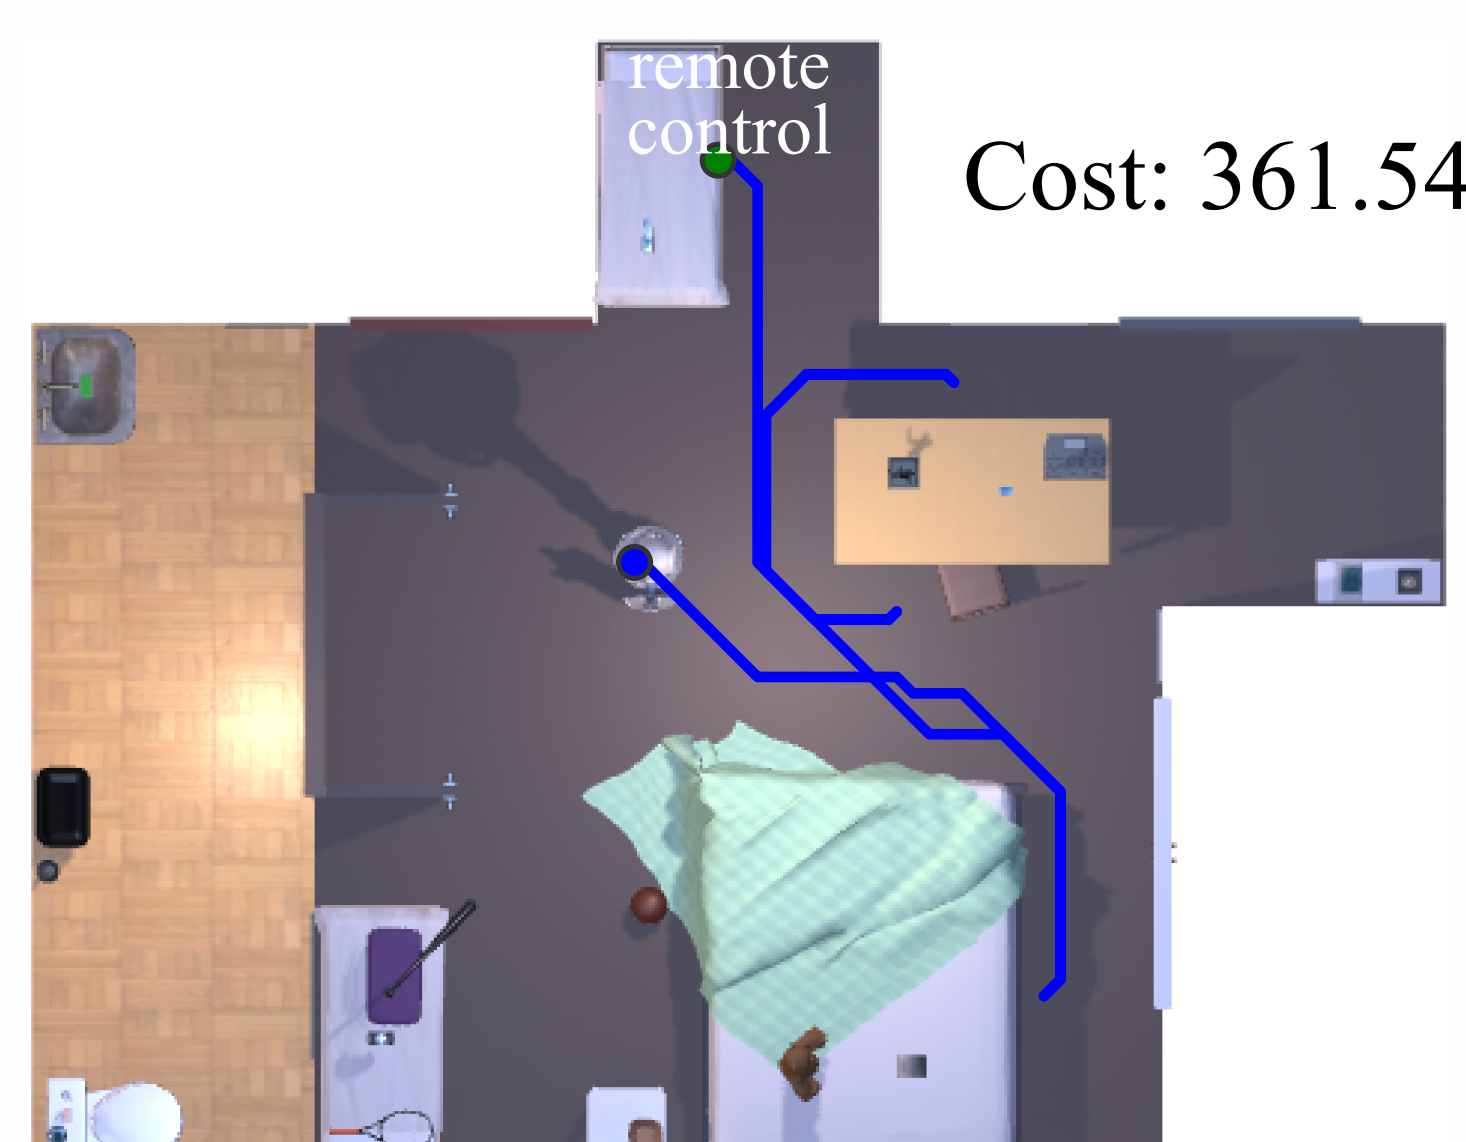

Prompt 4: P-DIRECT

Target Object: *remote control*

Applying black-box model selection for selecting prompts during deployment is too slow.

Upper Confidence Bound (UCB) bandit selection[1] trades off between exploitation and exploration to select among prompts and LLMs and takes many trials before converging towards the best prompt-LLM pair  $\theta$  accumulating large regret.

UCB Bandit based prompt-LLM selection in trial  $k+1$ :

$$\pi_{\theta}^{(k+1)} = \underset{\pi_{\theta} \in \mathcal{P}}{\operatorname{argmin}} \left[ \bar{C}_k(\pi_{\theta}) - c \sqrt{\frac{\ln k}{n_k(\pi_{\theta})}} \right]$$

Exploit: Pick to minimize mean cost so far.

Explore: Pick to potentially improve performance.

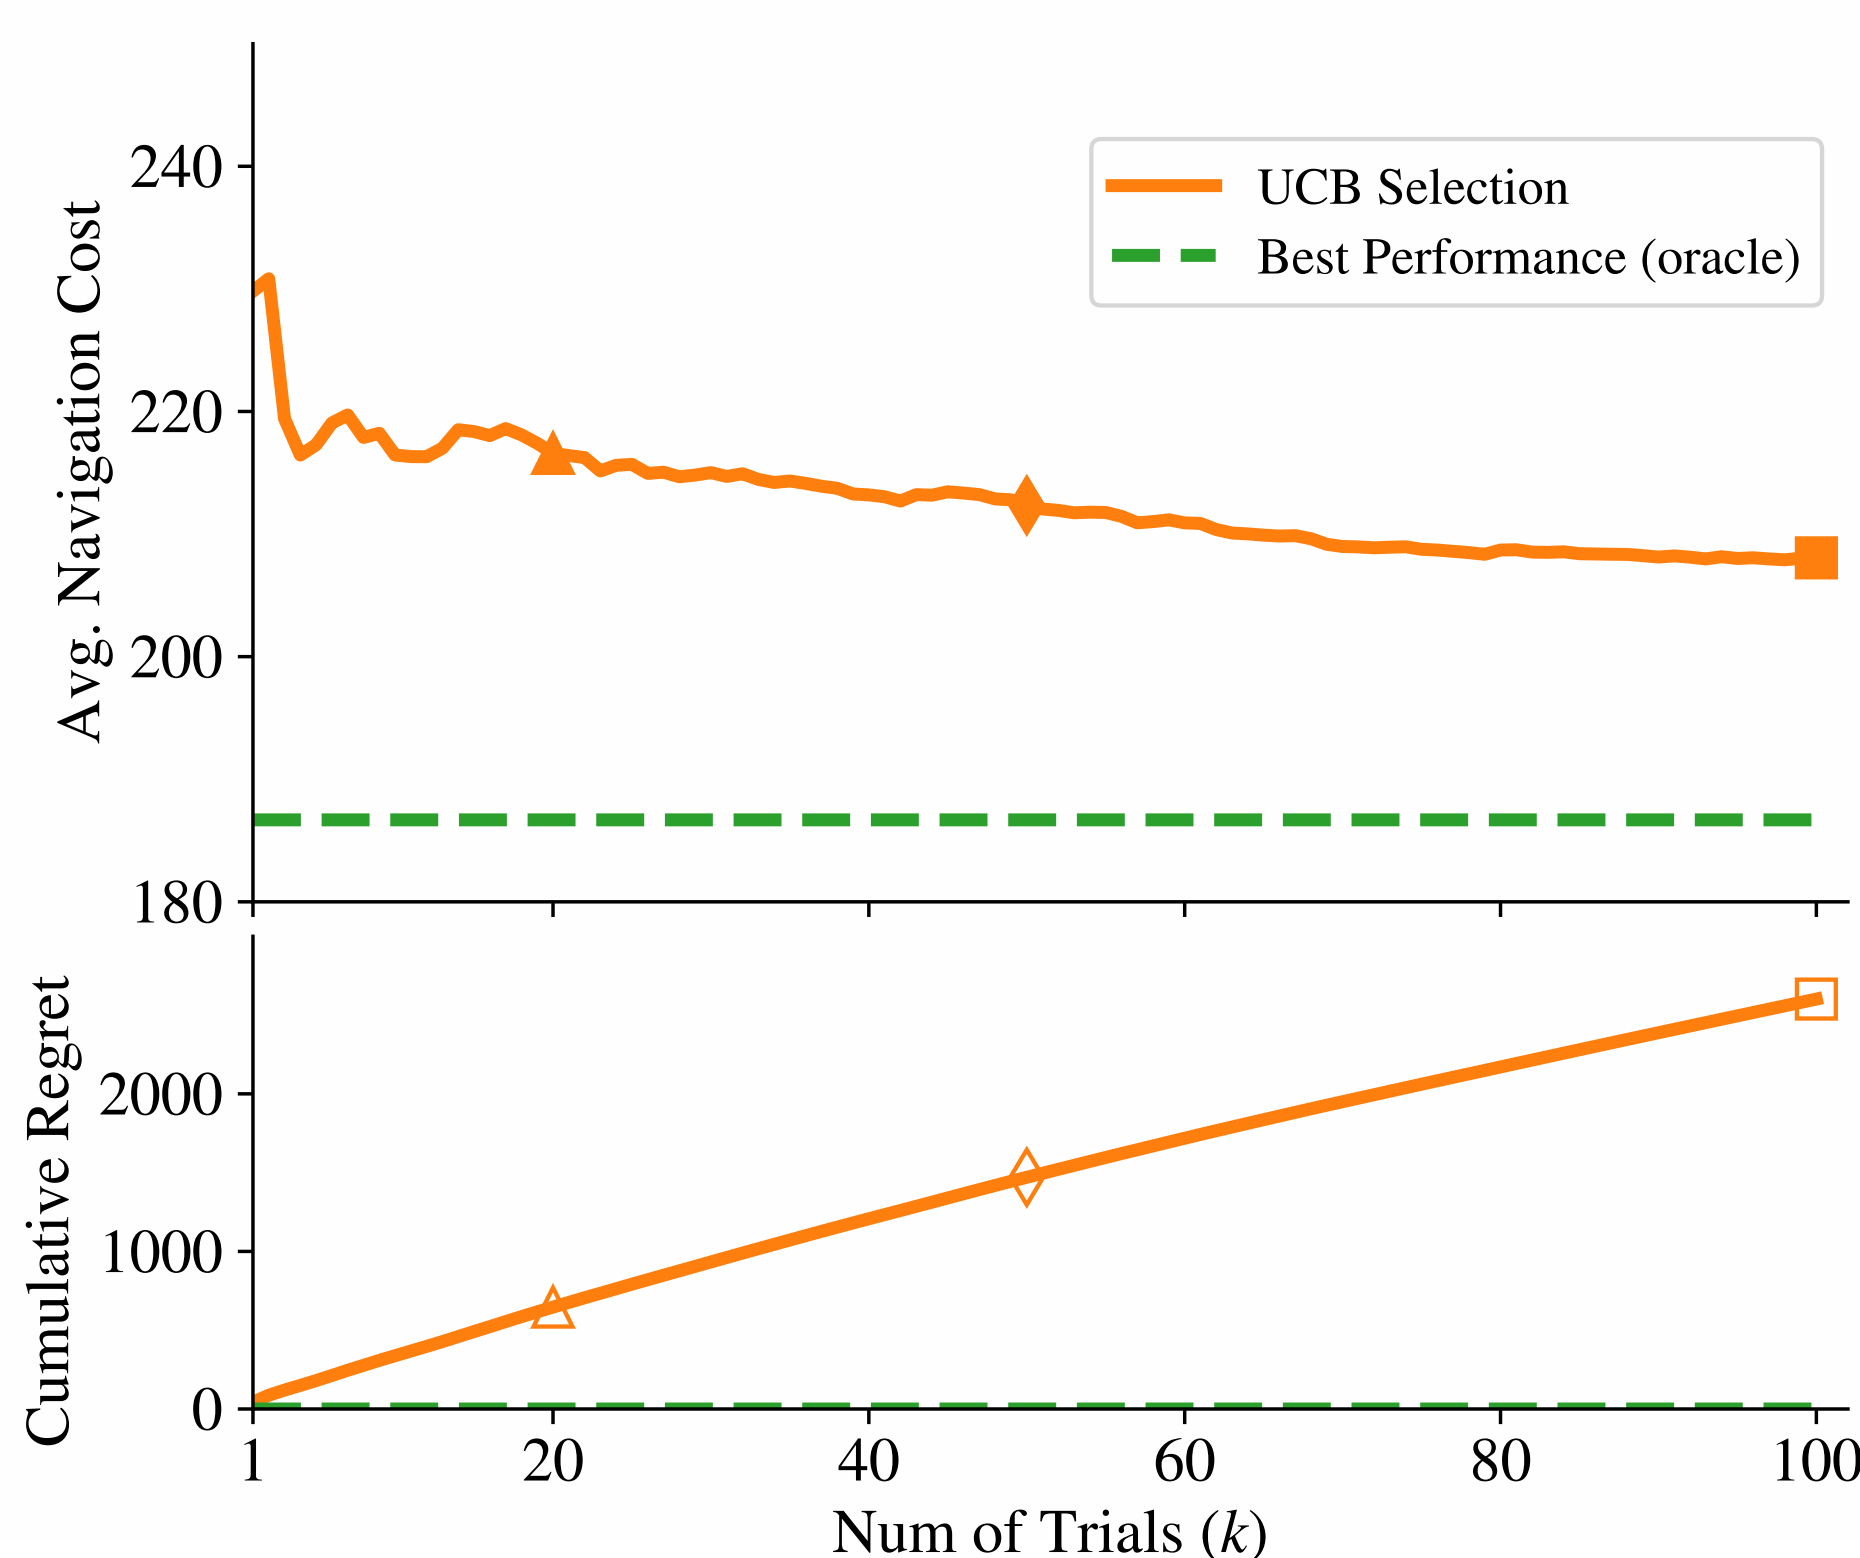

Leveraging prior work [2], we seek to enable white-box selection of prompts and LLMs during deployment.

In trial  $k+1$ , policy  $\pi_{\theta}$  with prompt-LLM pair  $\theta$  to be selected for deployment is given by:

$$\pi_{\theta}^{(k+1)} = \underset{\pi_{\theta} \in \mathcal{P}}{\operatorname{argmin}} \left[ \max \left( \bar{C}_k^{\text{lb}}(\pi_{\theta}), \bar{C}_k(\pi_{\theta}) - c \sqrt{\frac{\ln k}{n_k(\pi_{\theta})}} \right) \right]$$

Lower bound cost based on offline replay of prompt-LLM pair  $\theta$

Lower bound cost based on UCB algorithm

We use high-level action abstraction and model-based planning [3] for object search in partially known environments.

$$Q_{\pi}(b_t, a_t \in \mathcal{A}(b_t)) = D(b_t, a_t) + R_{\text{search}}(b_t, a_t) + (1 - P_S(a_t))Q_{\pi}(b'_t, \pi(b'_t))$$

Informed by LLM

Our approach enables quick selection of best prompts and LLMs during deployment.

Leveraging prior work by Paudel and Stein [2] on white-box selection, our approach uses information collected during trial (e.g. objects found in explored containers) and the map to *replay* the robot behavior informed by all other alternative prompts and LLMs, the outcomes of which are used for selection of best prompts and LLMs.

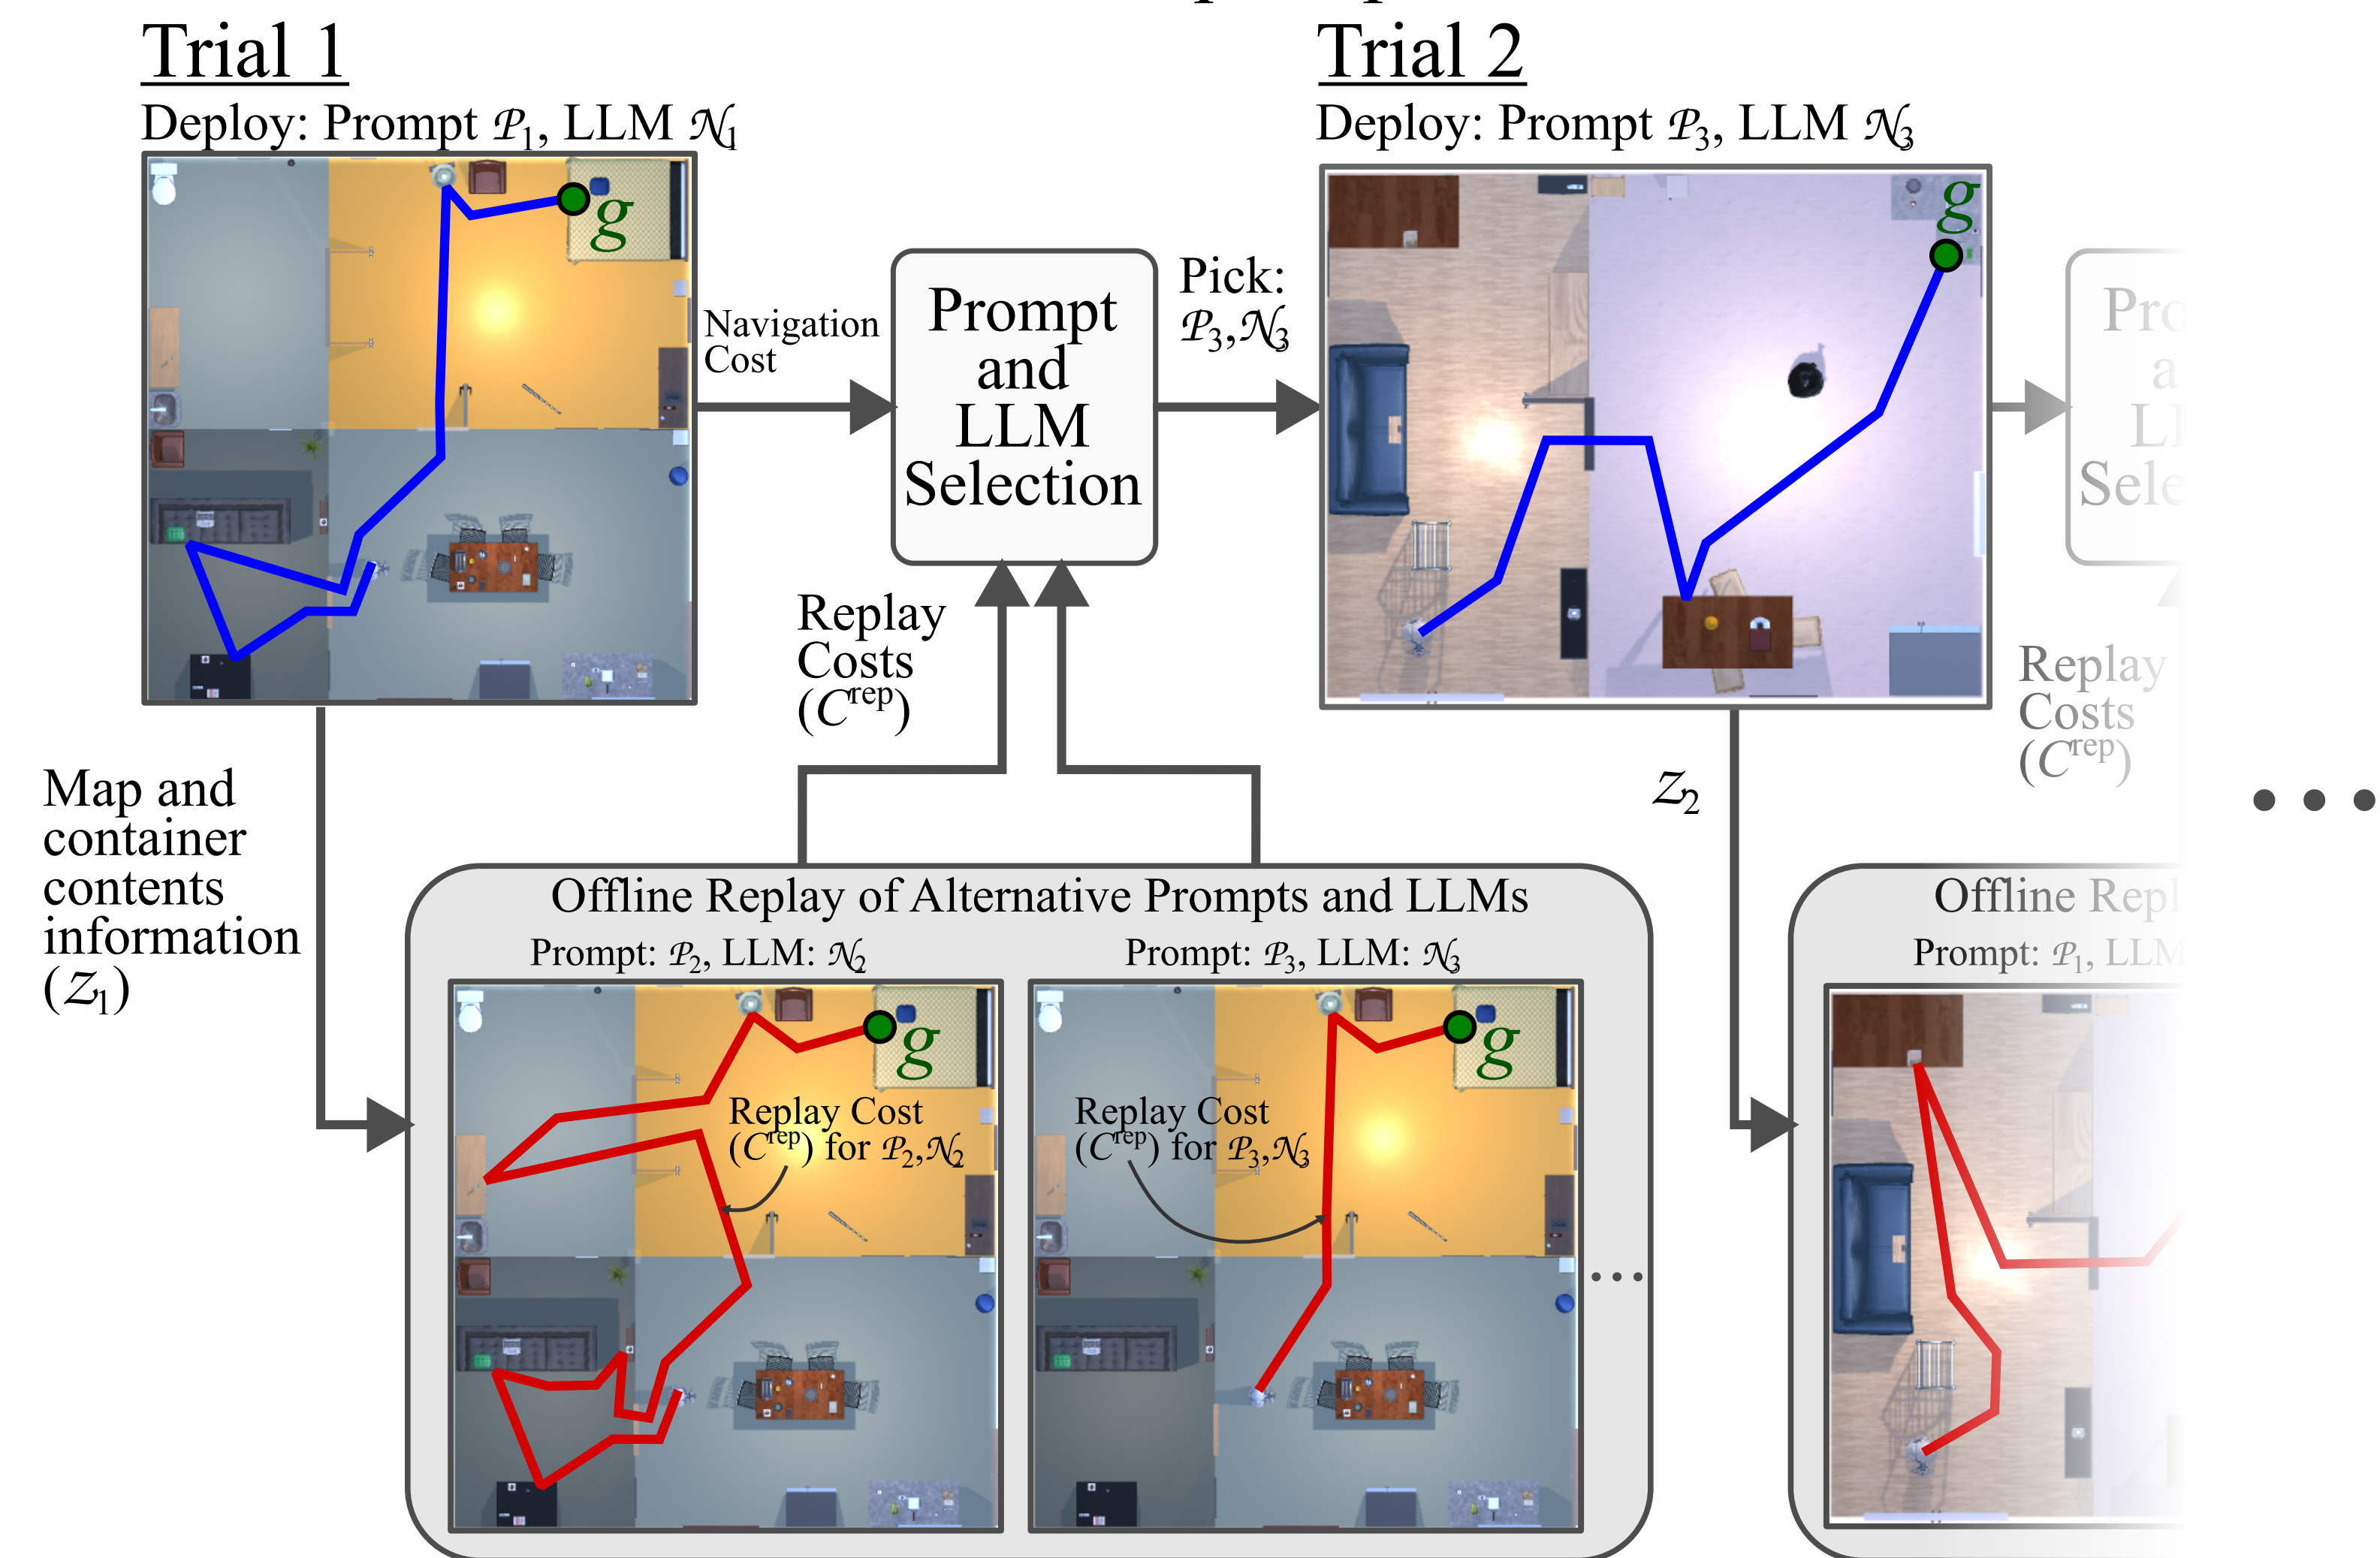

Prompt Selection Results

| Metric        | Selection Approach      | Num of Trials ( $k$ ) |                |                |
|---------------|-------------------------|-----------------------|----------------|----------------|
|               |                         | $k = 20$              | $k = 50$       | $k = 100$      |
| Avg. Cost     | UCB Selection           | 216.58▲               | 212.33◆        | 208.06■        |
|               | Replay Selection (ours) | <b>206.63▲</b>        | <b>199.38◆</b> | <b>195.35■</b> |
| Cumul. Regret | UCB Selection           | 646.6▲                | 1470.5◆        | 2601.5■        |
|               | Replay Selection (ours) | <b>572.1▲</b>         | <b>1042.3◆</b> | <b>1544.7■</b> |

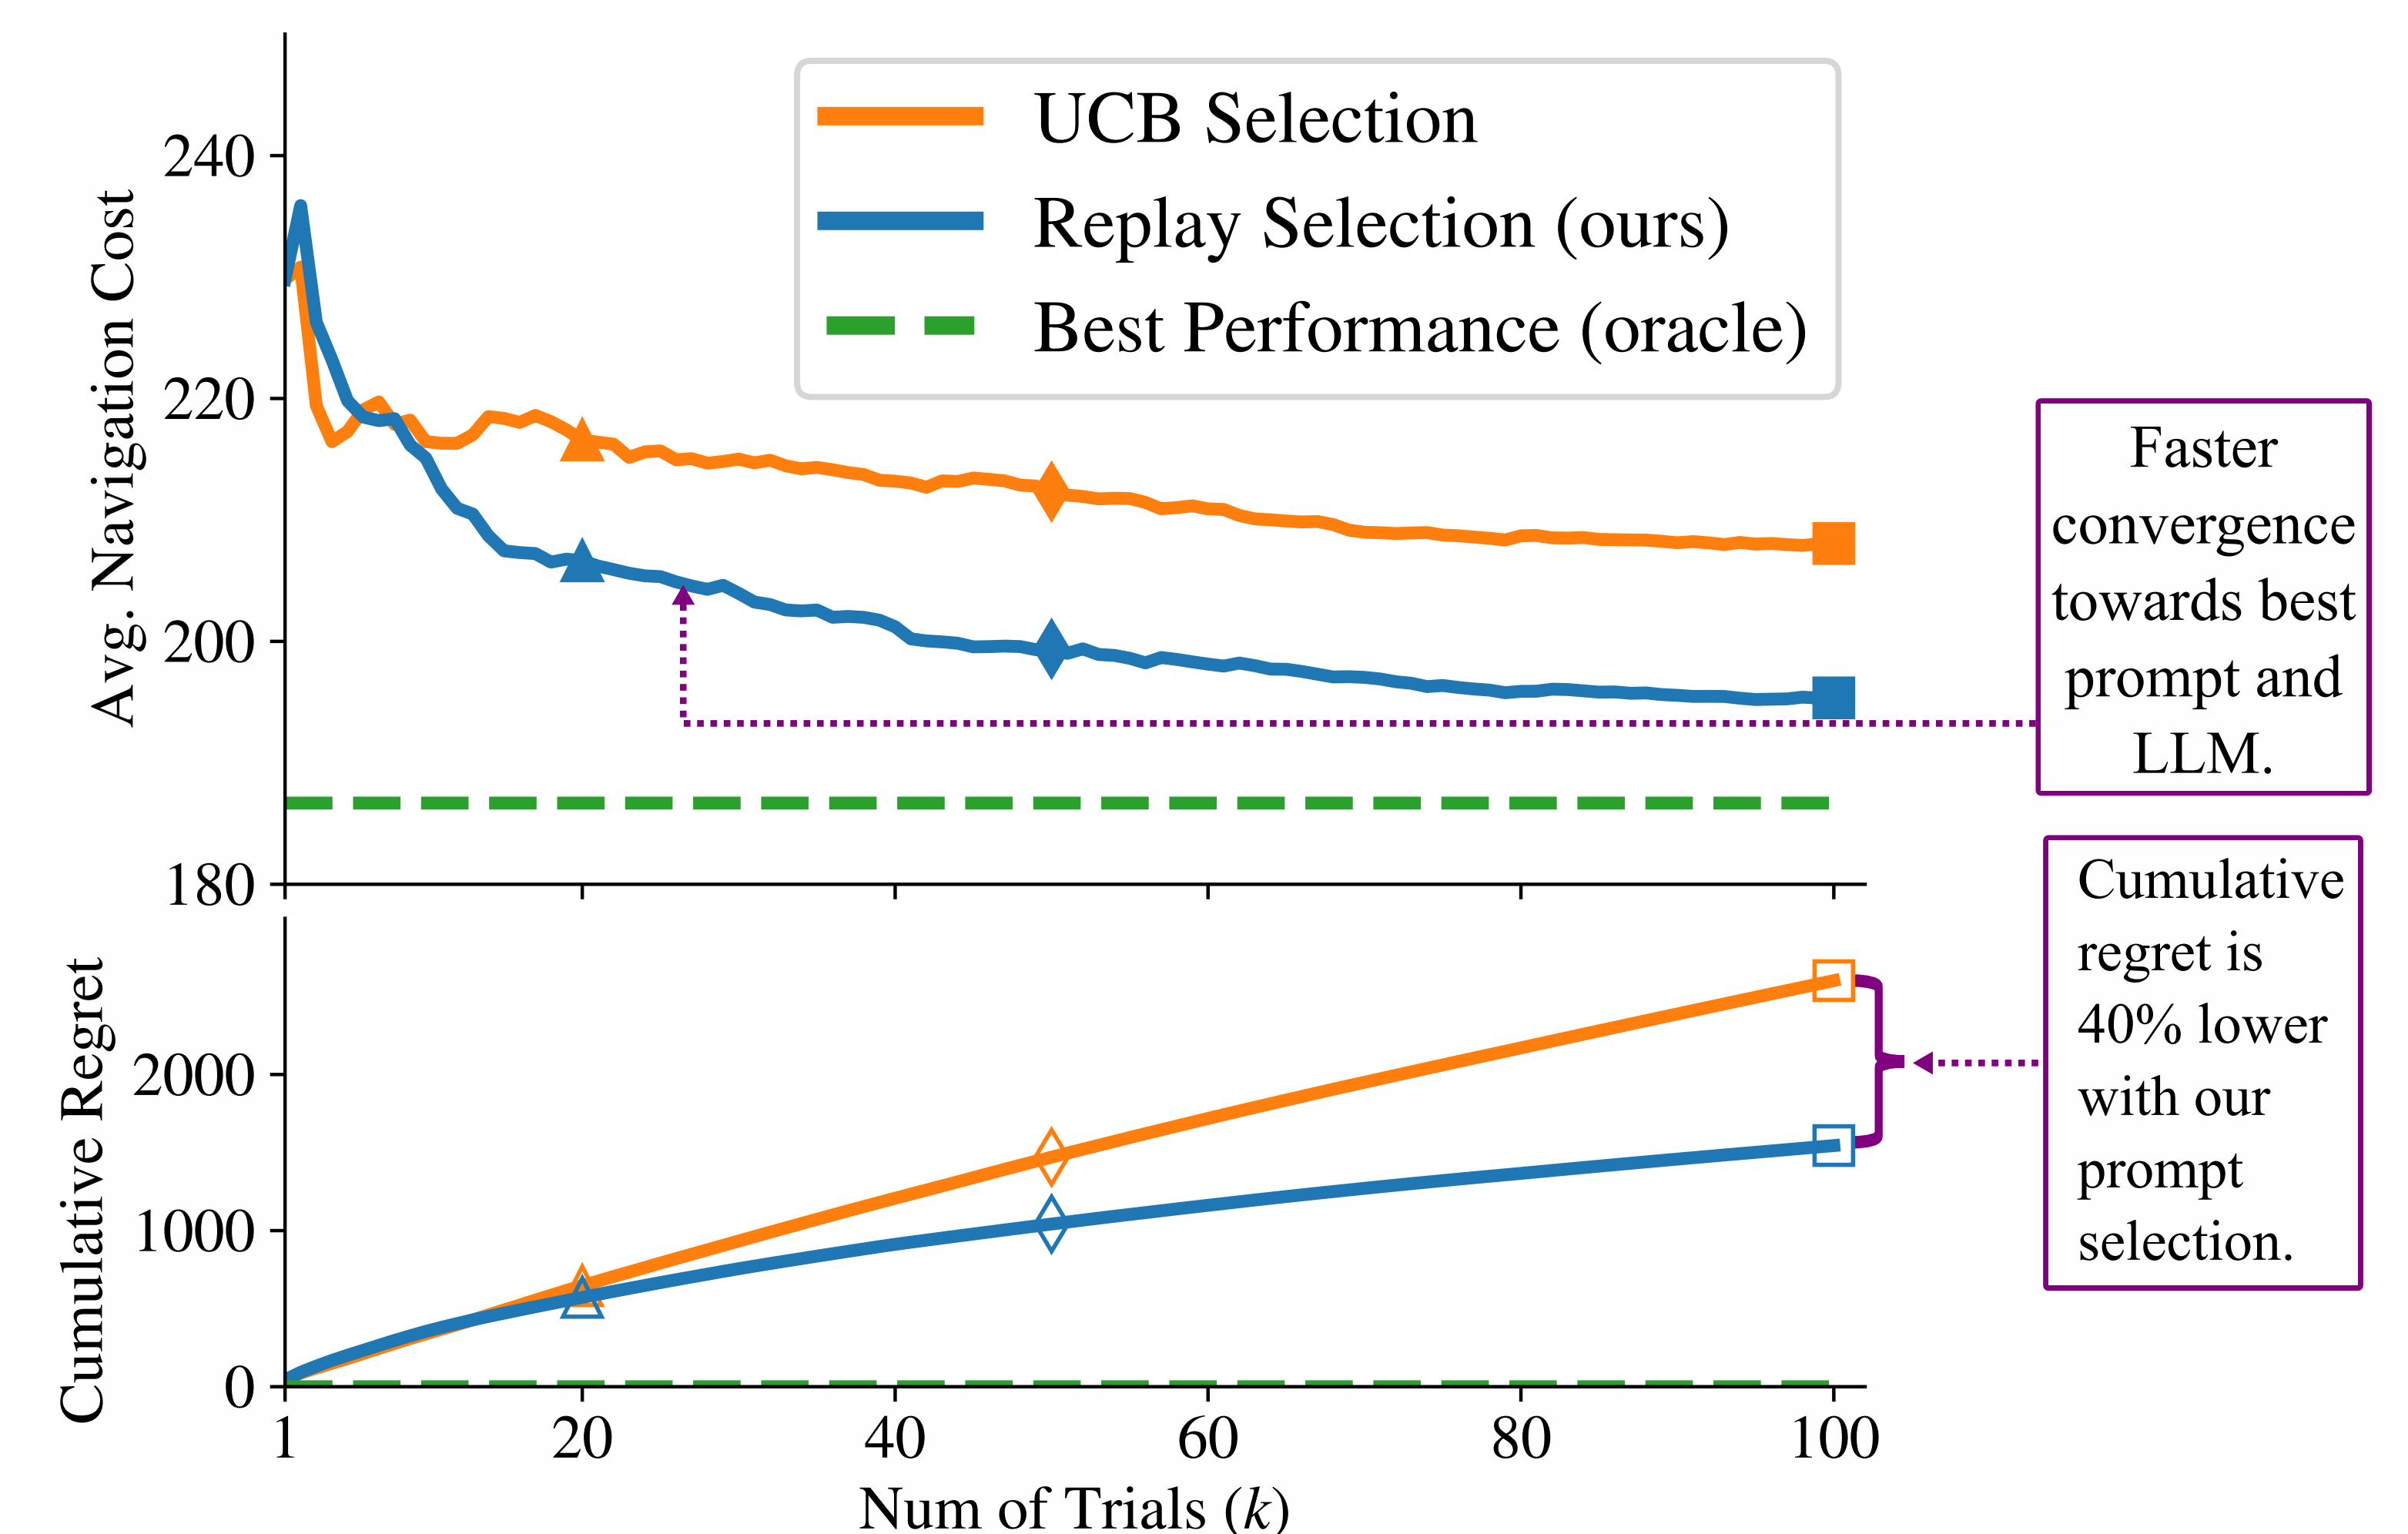

Performance when deploying only one policy/prompt/LLM combination:

| Policy / Prompt / LLM            | Avg. Cost     |
|----------------------------------|---------------|
| LLM+MODEL / P-CONTEXT-A / GPT-4o | 227.66        |
| LLM+MODEL / P-CONTEXT-B / GPT-4o | 192.25        |
| LLM+MODEL / P-MINIMAL / GPT-4o   | 205.55        |
| LLM-DIRECT / P-DIRECT / GPT-4o   | 250.42        |
| LLM+MODEL / P-CONTEXT-A / Gemini | <b>186.69</b> |
| LLM+MODEL / P-CONTEXT-B / Gemini | 188.11        |
| LLM+MODEL / P-MINIMAL / Gemini   | 225.49        |
| LLM-DIRECT / P-DIRECT / Gemini   | 201.50        |
| OPTIMISTIC+GREEDY / - / -        | 298.19        |

## References

- [1] Lai, T. L., and Robbins, H.. Asymptotically Efficient Adaptive Allocation Rules. Advances in Applied Mathematics. 1985.
- [2] Paudel, A., and Stein, G. J.. Data-Efficient Policy Selection for Navigation in Partial Maps via Subgoal-Based Abstraction. International Conference on Intelligent Robots and Systems (IROS). 2023.
- [3] Hossain S., Paudel, A., and Stein, G. J.. Enhancing Object Search by Augmenting Planning with Predictions from Large Language Models. CoRL Workshop on Learning Effective Abstractions for Planning (LEAP). 2024.

## Acknowledgements

This material is based upon work supported by the National Science Foundation (NSF) under Grant No. 2232733.

Paper

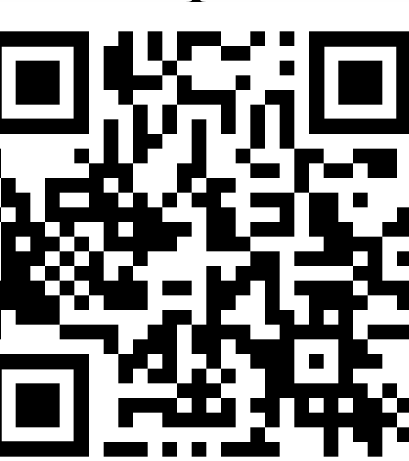

Supplement: supplementary_material [file attachment]
